# Supplementary material for: Fine-Mapping and Identification of a Candidate Gene Underlying the d2 Dwarfing Phenotype in Pearl Millet, Cenchrus americanus (L.) Morrone
Source: PubMed Central journal article supplement (PMC3583462; doi:10.1534/g3.113.005587), 2013-03-01
Supplement: supp_3.3.563_FileS1.pdf [file supp_3.3.563_FileS1.pdf]

File S1

Sequence of DNA fragment obtained with primer set Ca\_Sb07g023730F1/R5 in the tall inbred line ICMP 451.

ICMP 451\_Ca\_Sb07g023730F1R5

TACGCCTTCTACTTCCTCGTCGTCGGGGCAGCCATCTGGGCATCCTCCTGGGCCGAGATCTCCTGCTGGAT  
GTGGACCGGCGAGCGCCAGTCCACCCGGATGCGCATCCGCTACCTCGACGCCGCCCTCCGCCAGGACGTCT  
CCTTCTTCGACACCGACGTCCGCGCCTCCGACGTCATCTACGCCATCAACGCCGACGCCGTCTCGTCCAG  
GACGCCATCAGCGAGAAGCTCGGCAACCTCATCCACTACATGGCCACCTTCGTGCGCCGGATTTCGTGTCGG  
CTTCACCGCCGCCTGGCAGCTCGCGCTCGTCACGCTCGCCGTCGTACCGCTCATCGCCGTCATCGGGGGC  
TCAGCGCCGCCGCGCTCTCCAAGCTCTCCGCCAGGAGCCAGGACGCGCTCTCCGGCGCCAGCGCCATCGCC  
GAGCAGGCGCTGGCGCAGATACGGATCGTGCAGGCCTTCGTGCGCGAGGAGCGCGCCATGCGGGCGTACTC  
GGCGGCGCTGGCCGTCGCGCAGAAGATCGGCTACCGGAGCGGCGTCGCCAAGGGGCTCGGGCTCGGCGGCA  
CCTACTTCACCGTCTTCTGCTGCT
