# Supplementary material for: Fine-Mapping and Identification of a Candidate Gene Underlying the d2 Dwarfing Phenotype in Pearl Millet, Cenchrus americanus (L.) Morrone
Source: PubMed Central journal article supplement (PMC3583462; doi:10.1534/g3.113.005587), 2013-03-01
Supplement: supp_3.3.563_FileS2.pdf [file supp_3.3.563_FileS2.pdf]

File S2

Sequence of DNA fragments obtained with primer set Ca\_Sb07g023730F10/R10 in the tall inbred line ICMP 451 (A) and in the dwarf inbred line Tift 23DB (B). The synonymous SNP that differentiates the ICMP 451 and Tift 23DB sequences is shown in red.

A. ICMP 451\_Ca\_Sb07g023730F10/R10

GCAGGTTCTCCTTGATGCTCGTCGCGAACAGCGTCGGCTCCTGACTCACCAGGCCCATCTGCTGCCGGAGC  
CACCGGAGCTTCAGGCTCTTGAGGTCATGCCCGTCCAGCAGGATCTCACCTGTTGCAATTGCAATTC  
CGCTCATCAGAATAGTAGTTTGTCTTAGTAGTAGACTTTTCTGCCTATTACTAGAGGATGCCTATGAAT  
GACTGTGACTGGACAAGAGGATGATGCAGCGCAAAGGAAGCAGCCCATGAGGCCGGCAAGCTCTGCTCCAA  
TCCAAGCACTACTTGCTTGCTTGCTTGCAACACCCACCCAGCAATGGCGGGCAATGCTGATTACTGATG  
GCTCCAATCCAACAAGAGAATGTAACCAACAACGGGTATACCTGCGCTGGGGTCGTAGAACCTCTCGATGA  
GCGACACGACGGTGCTCTTCCCGGAGCCGGAGCTGCCGACCAGCGCGATGGTCTTCCCGGCGGGC  
ACGGTGAGGGAGAAGGCGCGCAGGATGGGCACGTCCGGCCGCGTCGGGTACGCGAAGTCGACGCCCCGCATCTCTAC  
CCGCCCCGTGACGGACTCCAGCTCCACCTGGCCGTCCCGCGAGATCCCCGGCTTGTGTCGATGATGCGGA  
AGATCTTGGCCGCCGCGACGCGGCCTTGGCGAAGGCGGCCATGCTCGGCGCCGACTGCCCCAGCGCGATG  
CCCCCGATCATGACGGAGAACATGGTGGCGATGGCGAGCCCCCGTTGGTGCGGTGGCCGCGCACCAGGTG  
GCCCCCGTACCAGAGCAGCAGCCCGTAGCAGCAGAAGACGGTGAAGTAGGTGCCTCCGAG

B. Tift 23DB\_Ca\_Sb07g023730F10/R10

GCAGGTTCTCCTTGATGCTCGTCGCGAACAGCGTCGGCTCCTGACTCACCAGGCCCATCTGCTGCCGGAGC  
CACCGGAGCTTCAGGCTCTTGAGGTCATGCCCGTCCAGCAGGATCTCACCTGTTGCAATTGCAATTC  
CGCTCATCAGAATAGTAGTTTGTCTTAGTAGTAGACTTTTCTGCCTATTACTAGAGGATGCCTATGAAT  
GACTGTGACTGGACAAGAGGATGATGCAGCGCAAAGGAAGCAGCCCATGAGGCCGGCAAGCTCTGCTCCAA  
TCCAAGCACTACTTGCTTGCTTGCTTGCAACACCCACCCAGCAATGGCGGGCAATGCTGATTACTGATG  
GCTCCAATCCAACAAGAGAATGTAACCAACAACGGGTATACCTGCGCTGGGGTCGTAGAACCTCTCGATGA  
GCGACACGACGGTGCTCTTCCCGGAGCCGGAGCTGCCGACCAGCGCGATGGTCTTCCCGGCGGGC  
ACGGTGAGGGAGAAGGCGCGCAGGATGGGCACGTCCGGCCGCGTCGGGTACGCGAAGTCGACGCCCCGCATCTCTAC  
CCGCCCCGTGACGGACTCCAGCTCCACCTGGCCGTCCCGCGAGATCCCCGGCTTGTGATCGATGATGCGGA  
AGATCTTGGCCGCCGCGACGCGGCCTTGGCGAAGGCGGCCATGCTCGGCGCCGACTGCCCCAGCGCGATG  
CCCCCGATCATGACGGAGAACATGGTGGCGATGGCGAGCCCCCGTTGGTGCGGTGGCCGCGCACCAGGTG  
GCCCCCGTACCAGAGCAGCAGCCCGTAGCAGCAGAAGACGGTGAAGTAGGTGCCTCCGAG
