# Supplementary material for: Fine-Mapping and Identification of a Candidate Gene Underlying the d2 Dwarfing Phenotype in Pearl Millet, Cenchrus americanus (L.) Morrone
Source: PubMed Central journal article supplement (PMC3583462; doi:10.1534/g3.113.005587), 2013-03-01
Supplement: supp_3.3.563_TableS1.pdf [file supp_3.3.563_TableS1.pdf]

**Table S1 Primer sequences, their melting temperature and location in the sorghum, rice and foxtail millet genomes of markers mapped in the *d2* region**

| Marker         |    | Primer sequences      | Tm<br>(°C) | Corresponding sorghum gene | Location in sorghum genome (Mb) <sup>1</sup> | Corresponding rice gene | Location in rice genome (Mb) <sup>1</sup> | Corresponding foxtail millet gene | Location in foxtail millet genome (Mb) <sup>1</sup> |
|----------------|----|-----------------------|------------|----------------------------|----------------------------------------------|-------------------------|-------------------------------------------|-----------------------------------|-----------------------------------------------------|
| B224C4P2       | F2 | TTCCTGGGATCAAAGGTTTC  | 59-52      | -                          | -                                            | -                       | -                                         | -                                 | -                                                   |
|                | R1 | CCATATCTCCAAGCTGCATAG |            |                            |                                              |                         |                                           |                                   |                                                     |
| Ca_Sb07g024020 | F  | CCACGCGCTTCTTCTCC     | 61         | Sb07g024020                | 7: 59.04                                     | Os08g0560300            | 8: 28.15                                  | Si015992m                         | VI: 35.69                                           |
|                | R  | TCCTCCACCTCGGACACG    |            |                            |                                              |                         |                                           |                                   |                                                     |
| Ca_Sb07g023910 | F  | CATGCACTGACGAGGTTGG   | 53         | Sb07g023910                | 7: 58.93                                     | Os080562100             | 8: 28.23                                  | Si013632m                         | VI: 35.76                                           |
|                | R  | TGCCCCATTTTTGGATGAGC  |            |                            |                                              |                         |                                           |                                   |                                                     |
| RGR1963        | 2F | GTACGCCTACAGTCAAGGTG  | 59-52      | Sb07g023850                | 7: 58.82                                     | Os08g0562700            | 8: 28.27                                  | Si013315m                         | VI: 35.80                                           |
|                | 2R | CCAAGCTCGTGTGCGCAG    |            |                            |                                              |                         |                                           |                                   |                                                     |
| Ca_Sb07g023840 | F  | ACATCCTCCCCTCCGTATTC  | 53         | Sb07g023840                | 7: 58.81                                     | Os08g0562800            | 8: 28.27                                  | Si013571m                         | VI: 35.81                                           |
|                | R  | ATGGAGAAGCTGTCCTGAAG  |            |                            |                                              |                         |                                           |                                   |                                                     |
| Ca_Sb07g023810 | F  | CTTGGCTACCATGTGGTG    | 61         | Sb07g023810                | 7: 58.78                                     | Os08g0563400            | 8: 28.30                                  | Si015156m                         | VI: 35.83                                           |
|                | R  | GACTCTAGTTCTGCTTGCAG  |            |                            |                                              |                         |                                           |                                   |                                                     |

|                |    |                         |           |             |          |              |           |           |           |
|----------------|----|-------------------------|-----------|-------------|----------|--------------|-----------|-----------|-----------|
| Ca_Sb07g023730 | F1 | TACGCCTTCTACTTCCTCGTC   | 61        | Sb07g023730 | 7: 58.61 | Os080564300  | 8: 28.36  | Si013123m | VI: 35.86 |
|                | R5 | AGCAGCAGAAGACGGTGAAGTAG |           |             |          |              |           |           |           |
| Ca_Sb07g023630 | F  | GCTCTTTTCAGCAACCCCTTC   | 53        | Sb07g023630 | 7: 58.53 | Os08g0564800 | 8: 28.39  | Si013125m | VI: 35.88 |
|                | R  | CGCTAACTGCAGCAGCAAGG    |           |             |          |              |           |           |           |
| Ca_Sb07g023520 | F  | GCCATTTTGGCGGAGATTGC    | 53        | Sb07g023520 | 7: 58.42 | Os080566000  | 8: 28.44  | Si013435m | VI: 35.92 |
|                | R  | CTGCGCACCAGCAATAGG      |           |             |          |              |           |           |           |
| Ca_Sb07g023500 | F  | GCTTTAGACGGTGCAGAC      | 59-<br>52 | Sb07g023500 | 7: 58.40 | Os08g0566400 | 8: 28.46  | Si015293m | VI: 35.94 |
|                | R  | GAAGCTCATCCAATCCCTC     |           |             |          |              |           |           |           |
| Ca_Sb07g023470 | F  | AGCTTCAGCTCCGTGCTTC     | 59-<br>52 | Sb07g023470 | 7: 58.39 | Os080566600  | 8: 28.47  | Si015371m | VI: 35.95 |
|                | R  | GGAATCCGAGCTTCTCTCC     |           |             |          |              |           |           |           |
| Ca_Sb07g023460 | F2 | GCATCTGTCCAACTGACAGC    | 59-<br>52 | Sb07g023460 | 7: 58.38 | Os080566900  | 8: 28.48  | Si014505m | VI: 35.95 |
|                | R2 | ATCTTGCTGCCTTGAGGTTC    |           |             |          |              |           |           |           |
| Ca_Sb07g023440 | F  | CGCCTTCGACATGGACGAC     | 53        | Sb07g023440 | 7: 58.37 | Os080567100  | 8: 28.49  | Si015189m | VI: 35.96 |
|                | R  | CTTGTCGTGGCGGTAGTCG     |           |             |          |              |           |           |           |
| Ca_Sb07g023430 | F  | TGATAAACCCAGCAACCTTGG   | 53        | Sb07g023430 | 7: 58.37 | Os12g0641500 | 12: 27.75 | Si013129m | VI: 35.97 |
|                | R  | GAATCAAGTACACAGCTATGC   |           |             |          |              |           |           |           |

|         |    |                           |           |             |                    |   |   |          |          |
|---------|----|---------------------------|-----------|-------------|--------------------|---|---|----------|----------|
| PSMP344 | F  | CGTCCTGTACCTCAGCCTTG      | 59-<br>52 | Sb07g007800 | 7: 12.59-<br>12.61 | - | - | Si015622 | VI: 9.10 |
|         | R  | ATGCTACACCTGTCAGAACTAAGAG |           |             |                    |   |   |          |          |
| PSMP344 | F2 | GGCTTGTCACGTCCTGTACC      | 53        | Sb07g007800 | 7: 12.59           | - | - | Si015622 | VI: 9.10 |
|         | R2 | TCAATCATGCAGCAGCAATC      |           |             |                    |   |   |          |          |
| PSMP305 | F  | TGCAATAGTTTCCAGTTGTC      | 53        | -           | -                  | - | - | -        | VI: 1.36 |
|         | R  | TCAACAATTTGGTACAGACG      |           |             |                    |   |   |          |          |

<sup>1</sup>The number before the colon indicates the chromosome number; the number following the colon is the chromosomal location in Mb.
